# Supplementary material for: Reliability Analysis of Vertebral Landmark Labelling on Lumbar Spine X-ray Images
Source: MDPI journal article supplement (doi:10.3390/diagnostics13081411), 2023-04-13
Supplement: s1 [file s1]

# Reliability Analysis of Vertebral Landmark Labelling on Lumbar Spine X-ray Images

**Table S1.** Mean variations and inter-rater reliability of landmark points in the x and y directions according to rater groups (AP).

|       | Group A                |               |                      |                      | Group B                |               |                      |                      |
|-------|------------------------|---------------|----------------------|----------------------|------------------------|---------------|----------------------|----------------------|
|       | Mean (SD) <sup>†</sup> |               | ICC (95% CI)         |                      | Mean (SD) <sup>†</sup> |               | ICC (95% CI)         |                      |
|       | x                      | y             | x                    | y                    | x                      | y             | x                    | y                    |
| L1_p1 | 1.021 (0.955)          | 0.800 (0.659) | 0.972 (0.962, 0.980) | 0.998 (0.996, 0.998) | 1.071 (0.750)          | 0.741 (0.620) | 0.977 (0.959, 0.987) | 0.998 (0.997, 0.998) |
| L1_p2 | 1.243 (1.109)          | 0.746 (0.663) | 0.959 (0.942, 0.968) | 0.998 (0.997, 0.998) | 1.186 (0.871)          | 0.774 (0.634) | 0.969 (0.945, 0.982) | 0.998 (0.997, 0.998) |
| L1_p3 | 1.306 (1.171)          | 0.963 (0.832) | 0.952 (0.927, 0.966) | 0.996 (0.995, 0.997) | 1.528 (0.906)          | 0.764 (0.695) | 0.955 (0.912, 0.978) | 0.998 (0.997, 0.998) |
| L1_p4 | 1.428 (1.341)          | 1.076 (0.851) | 0.937 (0.919, 0.951) | 0.996 (0.993, 0.997) | 1.462 (0.997)          | 0.815 (0.713) | 0.951 (0.912, 0.974) | 0.997 (0.997, 0.998) |
| L2_p1 | 1.197 (1.027)          | 0.885 (0.717) | 0.961 (0.943, 0.971) | 0.997 (0.995, 0.998) | 1.326 (0.843)          | 0.821 (0.661) | 0.964 (0.938, 0.979) | 0.997 (0.996, 0.998) |
| L2_p2 | 1.351 (1.151)          | 0.802 (0.678) | 0.948 (0.932, 0.958) | 0.997 (0.996, 0.998) | 1.372 (0.943)          | 0.866 (0.678) | 0.956 (0.925, 0.975) | 0.997 (0.996, 0.998) |
| L2_p3 | 1.491 (1.257)          | 0.939 (0.797) | 0.938 (0.901, 0.958) | 0.996 (0.994, 0.997) | 1.744 (1.034)          | 0.777 (0.637) | 0.938 (0.881, 0.969) | 0.998 (0.997, 0.998) |
| L2_p4 | 1.624 (1.432)          | 1.062 (0.825) | 0.922 (0.886, 0.942) | 0.996 (0.993, 0.997) | 1.686 (1.090)          | 0.811 (0.634) | 0.933 (0.876, 0.966) | 0.998 (0.996, 0.998) |
| L3_p1 | 1.382 (1.137)          | 0.867 (0.679) | 0.947 (0.921, 0.962) | 0.997 (0.995, 0.998) | 1.519 (1.010)          | 0.778 (0.611) | 0.948 (0.906, 0.970) | 0.998 (0.997, 0.998) |
| L3_p2 | 1.582 (1.288)          | 0.778 (0.641) | 0.932 (0.904, 0.948) | 0.997 (0.996, 0.998) | 1.548 (1.026)          | 0.781 (0.575) | 0.941 (0.892, 0.966) | 0.998 (0.996, 0.998) |
| L3_p3 | 1.571 (1.314)          | 0.827 (0.704) | 0.931 (0.891, 0.955) | 0.997 (0.995, 0.998) | 1.842 (1.110)          | 0.708 (0.555) | 0.926 (0.865, 0.963) | 0.998 (0.997, 0.999) |
| L3_p4 | 1.844 (1.545)          | 0.927 (0.756) | 0.910 (0.868, 0.939) | 0.997 (0.994, 0.998) | 1.898 (1.196)          | 0.740 (0.577) | 0.915 (0.846, 0.957) | 0.998 (0.997, 0.999) |
| L4_p1 | 1.499 (1.244)          | 0.941 (0.756) | 0.937 (0.911, 0.955) | 0.996 (0.994, 0.998) | 1.569 (1.071)          | 0.872 (0.690) | 0.940 (0.895, 0.967) | 0.997 (0.995, 0.998) |
| L4_p2 | 1.794 (1.481)          | 0.819 (0.677) | 0.918 (0.882, 0.938) | 0.997 (0.996, 0.998) | 1.674 (1.139)          | 0.858 (0.664) | 0.930 (0.876, 0.962) | 0.997 (0.996, 0.998) |
| L4_p3 | 1.584 (1.311)          | 0.979 (0.874) | 0.933 (0.899, 0.955) | 0.996 (0.994, 0.997) | 1.802 (1.151)          | 0.773 (0.730) | 0.925 (0.859, 0.960) | 0.997 (0.997, 0.998) |
| L4_p4 | 1.869 (1.583)          | 1.138 (0.979) | 0.914 (0.874, 0.938) | 0.994 (0.992, 0.996) | 1.838 (1.255)          | 0.821 (0.811) | 0.917 (0.857, 0.959) | 0.997 (0.996, 0.998) |
| L5_p1 | 1.858 (1.589)          | 1.694 (1.704) | 0.907 (0.860, 0.933) | 0.985 (0.978, 0.989) | 1.701 (1.256)          | 1.496 (1.418) | 0.925 (0.888, 0.946) | 0.990 (0.986, 0.992) |
| L5_p2 | 2.184 (1.845)          | 1.703 (1.763) | 0.881 (0.833, 0.915) | 0.985 (0.978, 0.988) | 1.776 (1.337)          | 1.483 (1.418) | 0.916 (0.876, 0.940) | 0.990 (0.987, 0.992) |
| L5_p3 | 2.008 (1.645)          | 2.291 (2.230) | 0.904 (0.857, 0.933) | 0.974 (0.963, 0.979) | 1.978 (1.428)          | 1.952 (1.988) | 0.907 (0.851, 0.946) | 0.982 (0.974, 0.986) |
| L5_p4 | 2.290 (1.964)          | 2.309 (2.264) | 0.877 (0.818, 0.916) | 0.974 (0.964, 0.979) | 1.745 (1.464)          | 2.004 (2.053) | 0.917 (0.875, 0.940) | 0.980 (0.972, 0.985) |

Abbreviation: SD, standard deviation; ICC, intra-class correlation; CI, confidence interval.

<sup>†</sup>Unit: mm.

**Table S2.** Mean variations and inter-rater reliability of landmark points in the x and y directions according to rater groups (LAT).

|       | Group A                |               |                      |                      | Group B                |               |                      |                      |
|-------|------------------------|---------------|----------------------|----------------------|------------------------|---------------|----------------------|----------------------|
|       | Mean (SD) <sup>†</sup> |               | ICC (95% CI)         |                      | Mean (SD) <sup>†</sup> |               | ICC (95% CI)         |                      |
|       | x                      | y             | x                    | y                    | x                      | y             | x                    | y                    |
| L1_p1 | 0.795 (0.767)          | 0.706 (0.731) | 0.995 (0.993, 0.996) | 0.999 (0.998, 0.999) | 0.786 (0.664)          | 0.614 (0.810) | 0.996 (0.995, 0.997) | 0.999 (0.998, 0.999) |
| L1_p2 | 1.255 (1.129)          | 0.936 (0.839) | 0.988 (0.982, 0.991) | 0.998 (0.996, 0.998) | 1.021 (0.860)          | 0.905 (0.907) | 0.993 (0.991, 0.995) | 0.998 (0.996, 0.999) |
| L1_p3 | 0.923 (0.790)          | 0.603 (0.680) | 0.993 (0.990, 0.995) | 0.999 (0.999, 0.999) | 0.839 (0.700)          | 0.564 (0.789) | 0.995 (0.993, 0.996) | 0.999 (0.999, 0.999) |
| L1_p4 | 1.064 (0.959)          | 0.860 (0.869) | 0.990 (0.987, 0.992) | 0.998 (0.997, 0.998) | 1.040 (0.848)          | 0.731 (0.834) | 0.992 (0.987, 0.995) | 0.998 (0.998, 0.999) |
| L2_p1 | 0.876 (0.800)          | 0.659 (0.733) | 0.993 (0.990, 0.994) | 0.999 (0.998, 0.999) | 0.843 (0.691)          | 0.664 (0.866) | 0.995 (0.992, 0.996) | 0.999 (0.998, 0.999) |
| L2_p2 | 1.149 (1.036)          | 0.883 (0.828) | 0.988 (0.983, 0.991) | 0.998 (0.997, 0.998) | 1.032 (0.843)          | 0.939 (0.948) | 0.993 (0.989, 0.995) | 0.997 (0.995, 0.999) |
| L2_p3 | 0.987 (0.833)          | 0.683 (0.780) | 0.990 (0.986, 0.993) | 0.999 (0.998, 0.999) | 0.901 (0.737)          | 0.605 (0.915) | 0.994 (0.990, 0.996) | 0.999 (0.999, 0.999) |
| L2_p4 | 1.112 (0.986)          | 0.834 (0.842) | 0.987 (0.983, 0.990) | 0.998 (0.997, 0.998) | 1.050 (0.864)          | 0.693 (0.840) | 0.991 (0.985, 0.995) | 0.998 (0.998, 0.999) |
| L3_p1 | 0.911 (0.813)          | 0.645 (0.821) | 0.991 (0.988, 0.993) | 0.999 (0.998, 0.999) | 0.905 (0.737)          | 0.726 (1.031) | 0.993 (0.991, 0.995) | 0.998 (0.997, 0.999) |
| L3_p2 | 1.157 (1.034)          | 0.850 (0.847) | 0.986 (0.981, 0.989) | 0.998 (0.997, 0.998) | 1.021 (0.846)          | 0.935 (0.962) | 0.992 (0.987, 0.994) | 0.997 (0.995, 0.998) |
| L3_p3 | 0.921 (0.804)          | 0.748 (0.851) | 0.990 (0.986, 0.993) | 0.998 (0.998, 0.999) | 0.881 (0.706)          | 0.605 (0.945) | 0.993 (0.990, 0.995) | 0.999 (0.999, 0.999) |
| L3_p4 | 1.100 (0.971)          | 0.748 (0.785) | 0.986 (0.982, 0.989) | 0.998 (0.997, 0.998) | 1.057 (0.866)          | 0.689 (0.838) | 0.991 (0.984, 0.994) | 0.998 (0.997, 0.999) |
| L4_p1 | 0.965 (0.902)          | 0.675 (0.874) | 0.989 (0.986, 0.991) | 0.999 (0.998, 0.999) | 0.935 (0.854)          | 0.830 (1.106) | 0.992 (0.989, 0.994) | 0.998 (0.997, 0.998) |
| L4_p2 | 1.127 (1.007)          | 0.859 (0.846) | 0.985 (0.980, 0.988) | 0.997 (0.997, 0.998) | 0.999 (0.822)          | 0.935 (0.966) | 0.992 (0.988, 0.994) | 0.997 (0.995, 0.998) |
| L4_p3 | 0.926 (0.886)          | 0.855 (0.952) | 0.991 (0.988, 0.992) | 0.998 (0.997, 0.998) | 0.907 (0.789)          | 0.654 (0.997) | 0.994 (0.990, 0.995) | 0.999 (0.998, 0.999) |
| L4_p4 | 1.113 (0.966)          | 0.717 (0.727) | 0.987 (0.983, 0.990) | 0.998 (0.998, 0.998) | 1.047 (0.890)          | 0.707 (0.816) | 0.991 (0.985, 0.995) | 0.998 (0.997, 0.998) |
| L5_p1 | 0.982 (1.080)          | 0.805 (0.895) | 0.990 (0.987, 0.992) | 0.997 (0.997, 0.998) | 1.013 (1.019)          | 1.032 (1.007) | 0.993 (0.989, 0.995) | 0.996 (0.994, 0.998) |
| L5_p2 | 1.110 (1.089)          | 0.910 (0.843) | 0.987 (0.983, 0.990) | 0.997 (0.996, 0.997) | 0.988 (0.914)          | 0.965 (0.874) | 0.993 (0.990, 0.994) | 0.996 (0.994, 0.998) |
| L5_p3 | 0.962 (1.224)          | 1.094 (1.163) | 0.990 (0.988, 0.991) | 0.995 (0.993, 0.996) | 0.921 (1.153)          | 0.815 (0.896) | 0.992 (0.990, 0.993) | 0.997 (0.996, 0.997) |
| L5_p4 | 1.159 (1.216)          | 0.883 (0.893) | 0.987 (0.982, 0.989) | 0.997 (0.996, 0.997) | 1.076 (1.083)          | 0.900 (0.891) | 0.991 (0.986, 0.993) | 0.996 (0.996, 0.997) |

Abbreviation: SD, standard deviation; ICC, intra-class correlation; CI, confidence interval.

<sup>†</sup>Unit: mm.

**Table S3.** Mean variations and inter-rater reliability of each point in the x and y directions assessed by all 12 raters.

|       | AP                     |               |                      |                      | LAT                    |               |                      |                      |
|-------|------------------------|---------------|----------------------|----------------------|------------------------|---------------|----------------------|----------------------|
|       | Mean (SD) <sup>†</sup> |               | ICC (95% CI)         |                      | Mean (SD) <sup>†</sup> |               | ICC (95% CI)         |                      |
|       | x                      | y             | x                    | y                    | x                      | y             | x                    | y                    |
| L1_p1 | 1.110 (1.020)          | 0.789 (0.685) | 0.967 (0.952, 0.978) | 0.998 (0.997, 0.998) | 0.916 (0.882)          | 0.738 (1.126) | 0.993 (0.990, 0.994) | 0.997 (0.996, 0.998) |
| L1_p2 | 1.187 (1.122)          | 0.803 (0.699) | 0.958 (0.942, 0.969) | 0.998 (0.997, 0.998) | 1.212 (1.151)          | 1.005 (1.178) | 0.988 (0.983, 0.991) | 0.996 (0.995, 0.997) |
| L1_p3 | 1.409 (1.191)          | 0.894 (0.788) | 0.946 (0.923, 0.964) | 0.997 (0.996, 0.998) | 1.015 (0.913)          | 0.653 (1.099) | 0.990 (0.986, 0.993) | 0.997 (0.996, 0.998) |
| L1_p4 | 1.438 (1.379)          | 0.986 (0.837) | 0.932 (0.903, 0.950) | 0.997 (0.995, 0.998) | 1.098 (1.034)          | 0.909 (1.206) | 0.989 (0.984, 0.991) | 0.996 (0.995, 0.997) |
| L2_p1 | 1.324 (1.084)          | 0.840 (0.693) | 0.953 (0.932, 0.968) | 0.998 (0.997, 0.998) | 1.002 (0.925)          | 0.718 (1.177) | 0.990 (0.985, 0.993) | 0.997 (0.996, 0.997) |
| L2_p2 | 1.340 (1.168)          | 0.844 (0.693) | 0.944 (0.923, 0.958) | 0.998 (0.997, 0.998) | 1.167 (1.121)          | 1.000 (1.243) | 0.987 (0.981, 0.990) | 0.995 (0.993, 0.997) |
| L2_p3 | 1.545 (1.263)          | 0.905 (0.785) | 0.934 (0.901, 0.957) | 0.997 (0.996, 0.998) | 1.066 (0.929)          | 0.690 (1.261) | 0.988 (0.983, 0.992) | 0.996 (0.995, 0.997) |
| L2_p4 | 1.595 (1.415)          | 0.970 (0.797) | 0.919 (0.885, 0.943) | 0.997 (0.995, 0.998) | 1.154 (1.095)          | 0.829 (1.201) | 0.986 (0.980, 0.990) | 0.996 (0.995, 0.997) |
| L3_p1 | 1.479 (1.212)          | 0.784 (0.633) | 0.940 (0.915, 0.958) | 0.998 (0.997, 0.999) | 1.032 (0.933)          | 0.736 (1.422) | 0.988 (0.983, 0.991) | 0.995 (0.994, 0.996) |
| L3_p2 | 1.510 (1.235)          | 0.766 (0.607) | 0.932 (0.903, 0.951) | 0.998 (0.997, 0.999) | 1.167 (1.123)          | 0.976 (1.284) | 0.985 (0.979, 0.989) | 0.995 (0.993, 0.996) |
| L3_p3 | 1.652 (1.341)          | 0.776 (0.666) | 0.926 (0.890, 0.950) | 0.998 (0.997, 0.999) | 0.990 (0.901)          | 0.742 (1.367) | 0.988 (0.983, 0.991) | 0.996 (0.994, 0.996) |
| L3_p4 | 1.778 (1.473)          | 0.870 (0.719) | 0.910 (0.870, 0.938) | 0.997 (0.996, 0.998) | 1.144 (1.080)          | 0.762 (1.161) | 0.985 (0.979, 0.989) | 0.996 (0.995, 0.997) |
| L4_p1 | 1.543 (1.231)          | 0.897 (0.756) | 0.933 (0.900, 0.954) | 0.997 (0.996, 0.998) | 1.022 (0.968)          | 0.825 (1.516) | 0.987 (0.982, 0.990) | 0.995 (0.993, 0.996) |
| L4_p2 | 1.648 (1.412)          | 0.836 (0.701) | 0.920 (0.888, 0.942) | 0.998 (0.997, 0.998) | 1.127 (1.062)          | 0.987 (1.286) | 0.985 (0.980, 0.989) | 0.995 (0.993, 0.996) |
| L4_p3 | 1.662 (1.366)          | 0.919 (0.890) | 0.924 (0.886, 0.946) | 0.997 (0.995, 0.997) | 0.980 (1.014)          | 0.834 (1.461) | 0.988 (0.982, 0.991) | 0.995 (0.994, 0.996) |
| L4_p4 | 1.772 (1.564)          | 1.058 (0.996) | 0.910 (0.870, 0.936) | 0.996 (0.994, 0.997) | 1.139 (1.070)          | 0.771 (1.083) | 0.986 (0.979, 0.989) | 0.996 (0.995, 0.997) |
| L5_p1 | 1.811 (1.471)          | 1.647 (1.608) | 0.911 (0.875, 0.934) | 0.989 (0.984, 0.992) | 1.063 (1.249)          | 0.950 (1.166) | 0.986 (0.981, 0.989) | 0.996 (0.995, 0.997) |
| L5_p2 | 1.956 (1.647)          | 1.564 (1.537) | 0.894 (0.851, 0.919) | 0.990 (0.986, 0.992) | 1.142 (1.183)          | 1.038 (1.046) | 0.986 (0.982, 0.989) | 0.996 (0.994, 0.997) |
| L5_p3 | 1.948 (1.575)          | 2.319 (2.399) | 0.907 (0.867, 0.937) | 0.976 (0.967, 0.982) | 1.015 (1.578)          | 1.033 (1.231) | 0.984 (0.980, 0.987) | 0.995 (0.993, 0.997) |
| L5_p4 | 2.039 (1.817)          | 2.368 (2.416) | 0.887 (0.845, 0.919) | 0.975 (0.967, 0.981) | 1.238 (1.452)          | 0.943 (0.995) | 0.983 (0.977, 0.987) | 0.996 (0.995, 0.997) |

Abbreviation: AP, anteroposterior; LAT, lateral; SD, standard deviation; ICC, intra-class correlation; CI, confidence interval.

<sup>†</sup>Unit: mm.

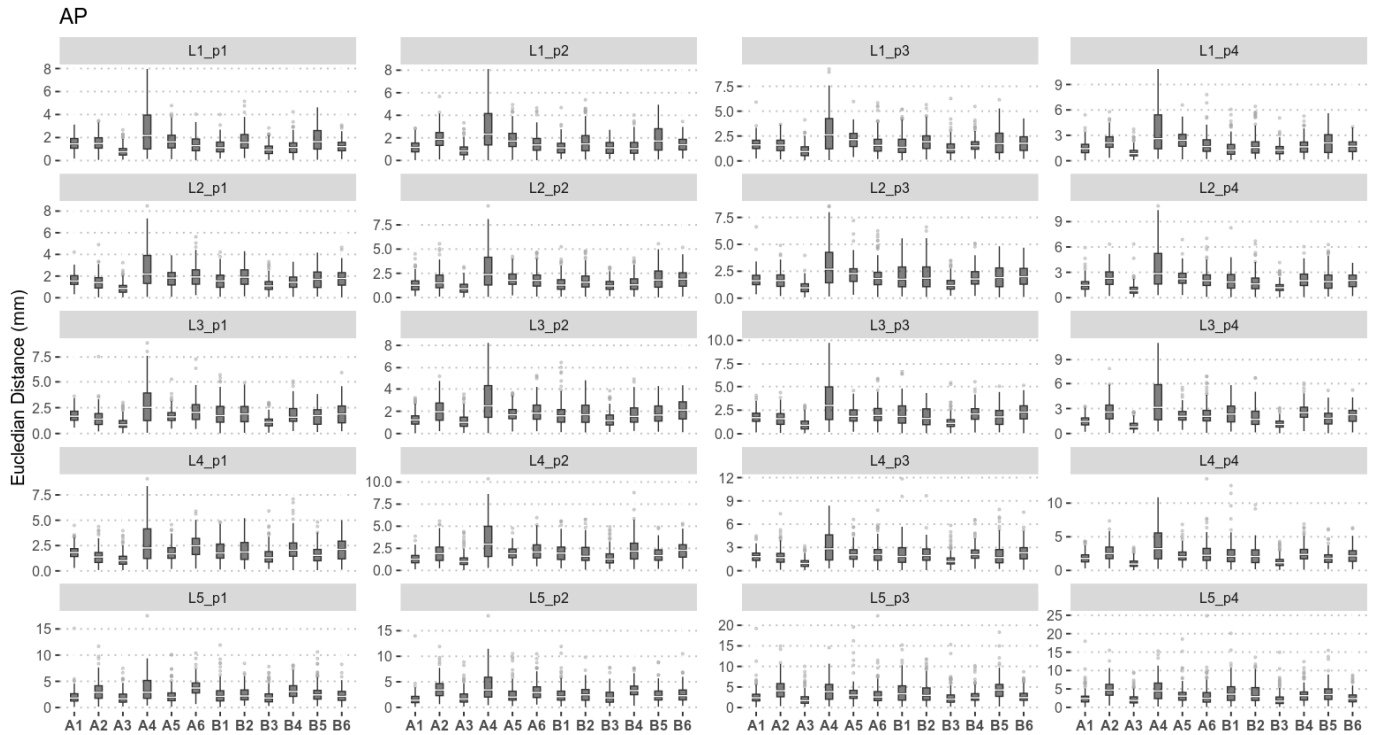

**Figure S1.** Boxplots of Euclidean distances from the mean location of all 12 raters' labelled landmark points on the AP view. The x-axis of each panel represents the identifier of raters within the group A and B.

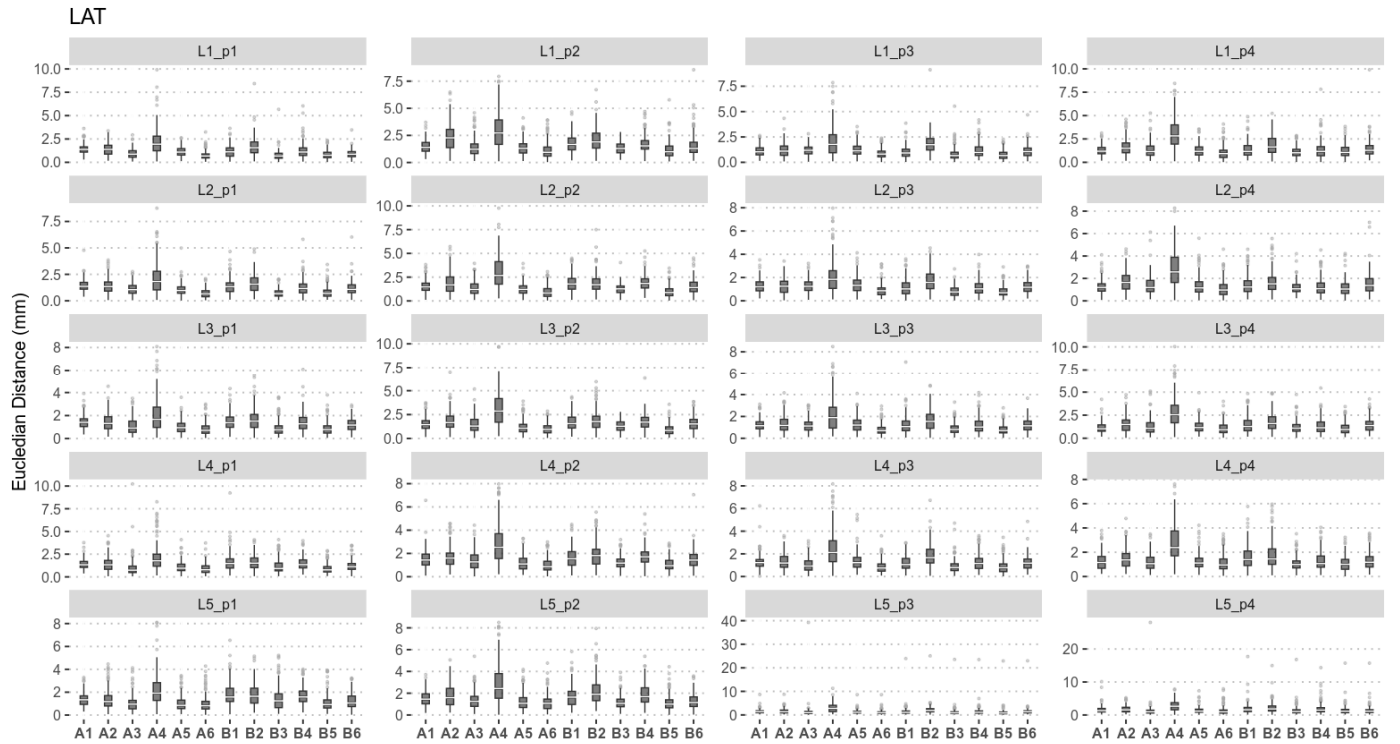

**Figure S2.** Boxplots of Euclidean distances from the mean location of all 12 raters' labelled landmark points on the LAT view. The x-axis of each panel represents the identifier of raters within the group A and B.

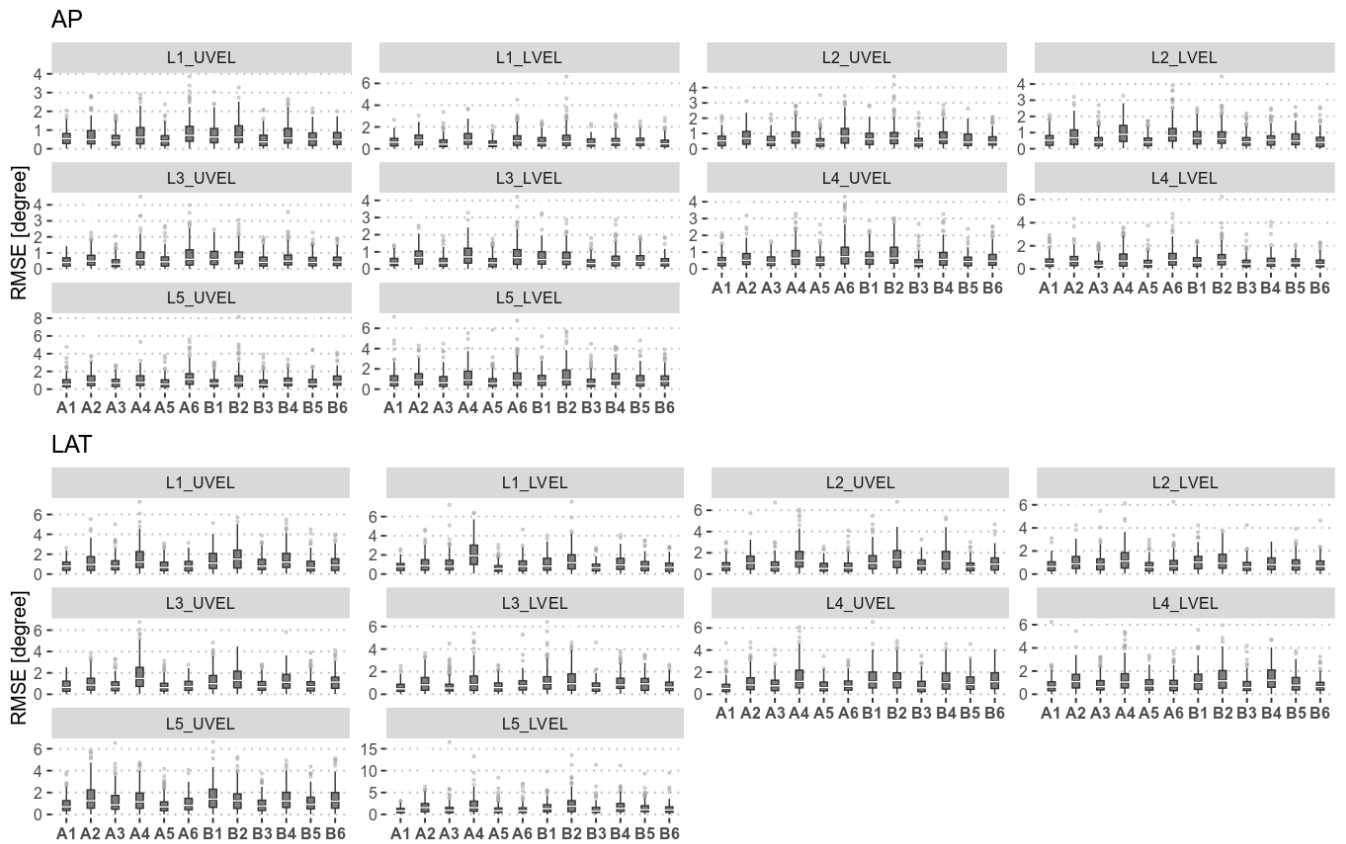

**Figure S3.** Boxplots of the RMSE of the angles of the UVEL and LVEL for all 12 raters. The x-axis of each panel represents the identifier of raters within the group A and B. Abbreviation: AP, antero-posterior; LAT, lateral.

**Table S4.** Summary of the omnibus test result for the effect of age and sex on the mean variations of all 12 raters' labelled landmark points using the LMM.

|       | AP       |          |         | LAT    |        |         |
|-------|----------|----------|---------|--------|--------|---------|
|       | Age      | Sex      | Age×Sex | Age    | Sex    | Age×Sex |
| L1_p1 | 0.0011   | 0.0693   | 0.9070  | 0.2891 | 0.0496 | 0.7155  |
| L1_p2 | 2.0.E-05 | 0.0006   | 0.8919  | 0.1283 | 0.0703 | 0.7952  |
| L1_p3 | 0.0028   | 1.2.E-05 | 0.2053  | 0.5323 | 0.0005 | 0.4145  |
| L1_p4 | 6.9.E-06 | 0.0005   | 0.0536  | 0.8876 | 0.7085 | 0.8966  |
| L2_p1 | 0.0005   | 0.0004   | 0.1830  | 0.3759 | 0.0011 | 0.5325  |
| L2_p2 | 0.0001   | 0.0128   | 0.0664  | 0.9669 | 0.4908 | 0.4682  |
| L2_p3 | 0.0120   | 0.0080   | 0.7550  | 0.6614 | 0.0121 | 0.7648  |
| L2_p4 | 0.0009   | 0.0138   | 0.2753  | 0.8639 | 0.4726 | 0.9473  |
| L3_p1 | 0.2877   | 0.0007   | 0.2495  | 0.0064 | 0.0001 | 0.9188  |
| L3_p2 | 0.2519   | 0.0037   | 0.2764  | 0.8985 | 0.9405 | 0.9563  |
| L3_p3 | 0.1119   | 0.0026   | 0.1095  | 0.4108 | 0.0006 | 0.7692  |
| L3_p4 | 0.0294   | 0.0005   | 0.3783  | 0.4339 | 0.0763 | 0.8376  |
| L4_p1 | 0.0059   | 0.0963   | 0.4661  | 0.0711 | 0.0252 | 0.6861  |
| L4_p2 | 0.2543   | 0.0055   | 0.2989  | 0.5477 | 0.0393 | 0.4331  |
| L4_p3 | 0.0057   | 0.3263   | 0.4357  | 0.4257 | 0.0412 | 0.9713  |
| L4_p4 | 0.0057   | 0.8249   | 0.8546  | 0.1772 | 0.0026 | 0.8282  |
| L5_p1 | 0.0065   | 0.1737   | 0.9425  | 0.0044 | 0.0296 | 0.4322  |
| L5_p2 | 0.0003   | 0.2069   | 0.6788  | 0.0479 | 0.0742 | 0.5127  |
| L5_p3 | 0.0065   | 0.7951   | 0.5903  | 0.1539 | 0.3719 | 0.5908  |
| L5_p4 | 0.0031   | 0.7363   | 0.5982  | 0.1616 | 0.6823 | 0.4345  |

Values represent p-values for age, sex and interaction between both fixed factors. The continuous variable age was grouped into four categories; less than 40, 40 to 54, 55 to 64 and greater than 65.

**Table S5.** Summary of the omnibus test result for the effect of age and sex on the mean variations of angles of the UVEL and LVEL using the LMM.

|         | AP     |        |         | LAT    |        |         |
|---------|--------|--------|---------|--------|--------|---------|
|         | Age    | Sex    | Age×Sex | Age    | Sex    | Age×Sex |
| L1_UVEL | 0.6957 | 0.0202 | 0.0161  | 0.0084 | 0.2860 | 0.4669  |
| L1_LVEL | 0.0161 | 0.3090 | 0.6226  | 0.2455 | 0.8094 | 0.2441  |
| L2_UVEL | 0.1240 | 0.5169 | 0.5149  | 0.2097 | 0.0973 | 0.9381  |
| L2_LVEL | 0.0121 | 0.1063 | 0.4469  | 0.3268 | 0.0602 | 0.4581  |
| L3_UVEL | 0.0734 | 0.0675 | 0.0020  | 0.0933 | 0.5041 | 0.3100  |
| L3_LVEL | 0.0998 | 0.0600 | 0.0359  | 0.2715 | 0.2273 | 0.0651  |
| L4_UVEL | 0.0698 | 0.0029 | 0.4008  | 0.1112 | 0.2299 | 0.6454  |
| L4_LVEL | 0.0136 | 0.1533 | 0.8312  | 0.7274 | 0.6538 | 0.7845  |
| L5_UVEL | 0.0039 | 0.2200 | 0.7164  | 0.0589 | 0.9988 | 0.0172  |
| L5_LVEL | 0.0006 | 0.4125 | 0.2684  | 0.0540 | 0.9603 | 0.5025  |

Values represent p-values for age, sex and interaction between both fixed factors. The continuous variable age was grouped into four categories; less than 40, 40 to 54, 55 to 64 and greater than 65.
